# Supplementary material for: Phosphate binding sites prediction in phosphorylation-dependent protein–protein interactions
Source: Oxford University Press journal article supplement (doi:10.1093/bioinformatics/btab525), 2021-07-13
Supplement: btab525_supplementary_data.doc [file btab525_supplementary_data.doc]

**Supplementary Data**

Phosphate binding sites prediction in phosphorylation-dependent protein-protein interactions

Zheng-Chang Lu1, Fan Jiang4 and Yun-Dong Wu1,2,3,*

*1Lab of Computational Chemistry and Drug Design, State Key Laboratory of Chemical Oncogenomics, Peking University Shenzhen Graduate School, Shenzhen 518055, China, 2Shenzhen Bay Laboratory, Shenzhen, 518055, China, 3College of Chemistry and Molecular Engineering, Peking University, Beijing 100871, China and 4NanoAI Biotech Co., Ltd, Shenzhen 518118, China*

**To whom correspondence should be addressed.*

**Contact:** [wuyd@pkusz.edu.cn](mailto:wuyd@pkusz.edu.cn)


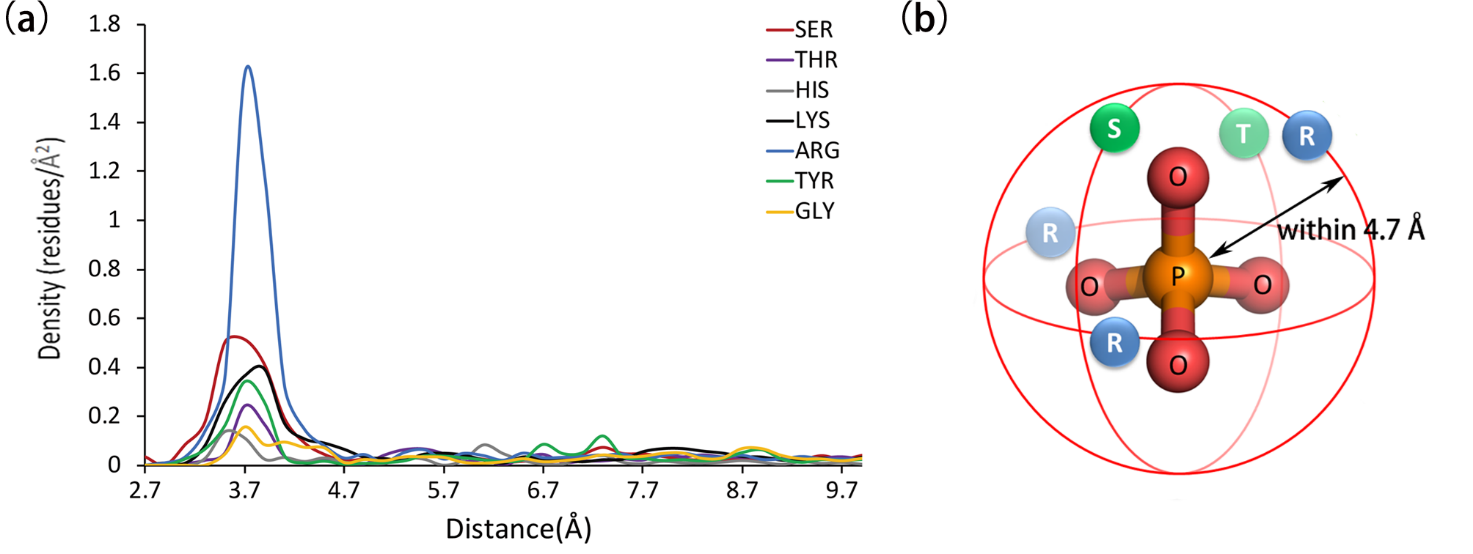


**Figure S1.** (a). Distribution of distances between heavy atoms of residues in receptor proteins and phosphate atoms of phosphate groups in ligands. The curve is normalized according to the law that the surface area of the shell increases in accordance with the square of the radius. The horizontal axis is the density of residues, which is calculated by the formula: density = total number of residues on the shell of 663 non-redundant complexes / surface area of the shell. (b) The definition of phosphate binding site. Residue of receptor in which at least one heavy atom is within 4.7 Å from phosphorus atom of ligand is defined as phosphate binding residue, and one phosphate binding site is composed of more than two phosphate binding residues.


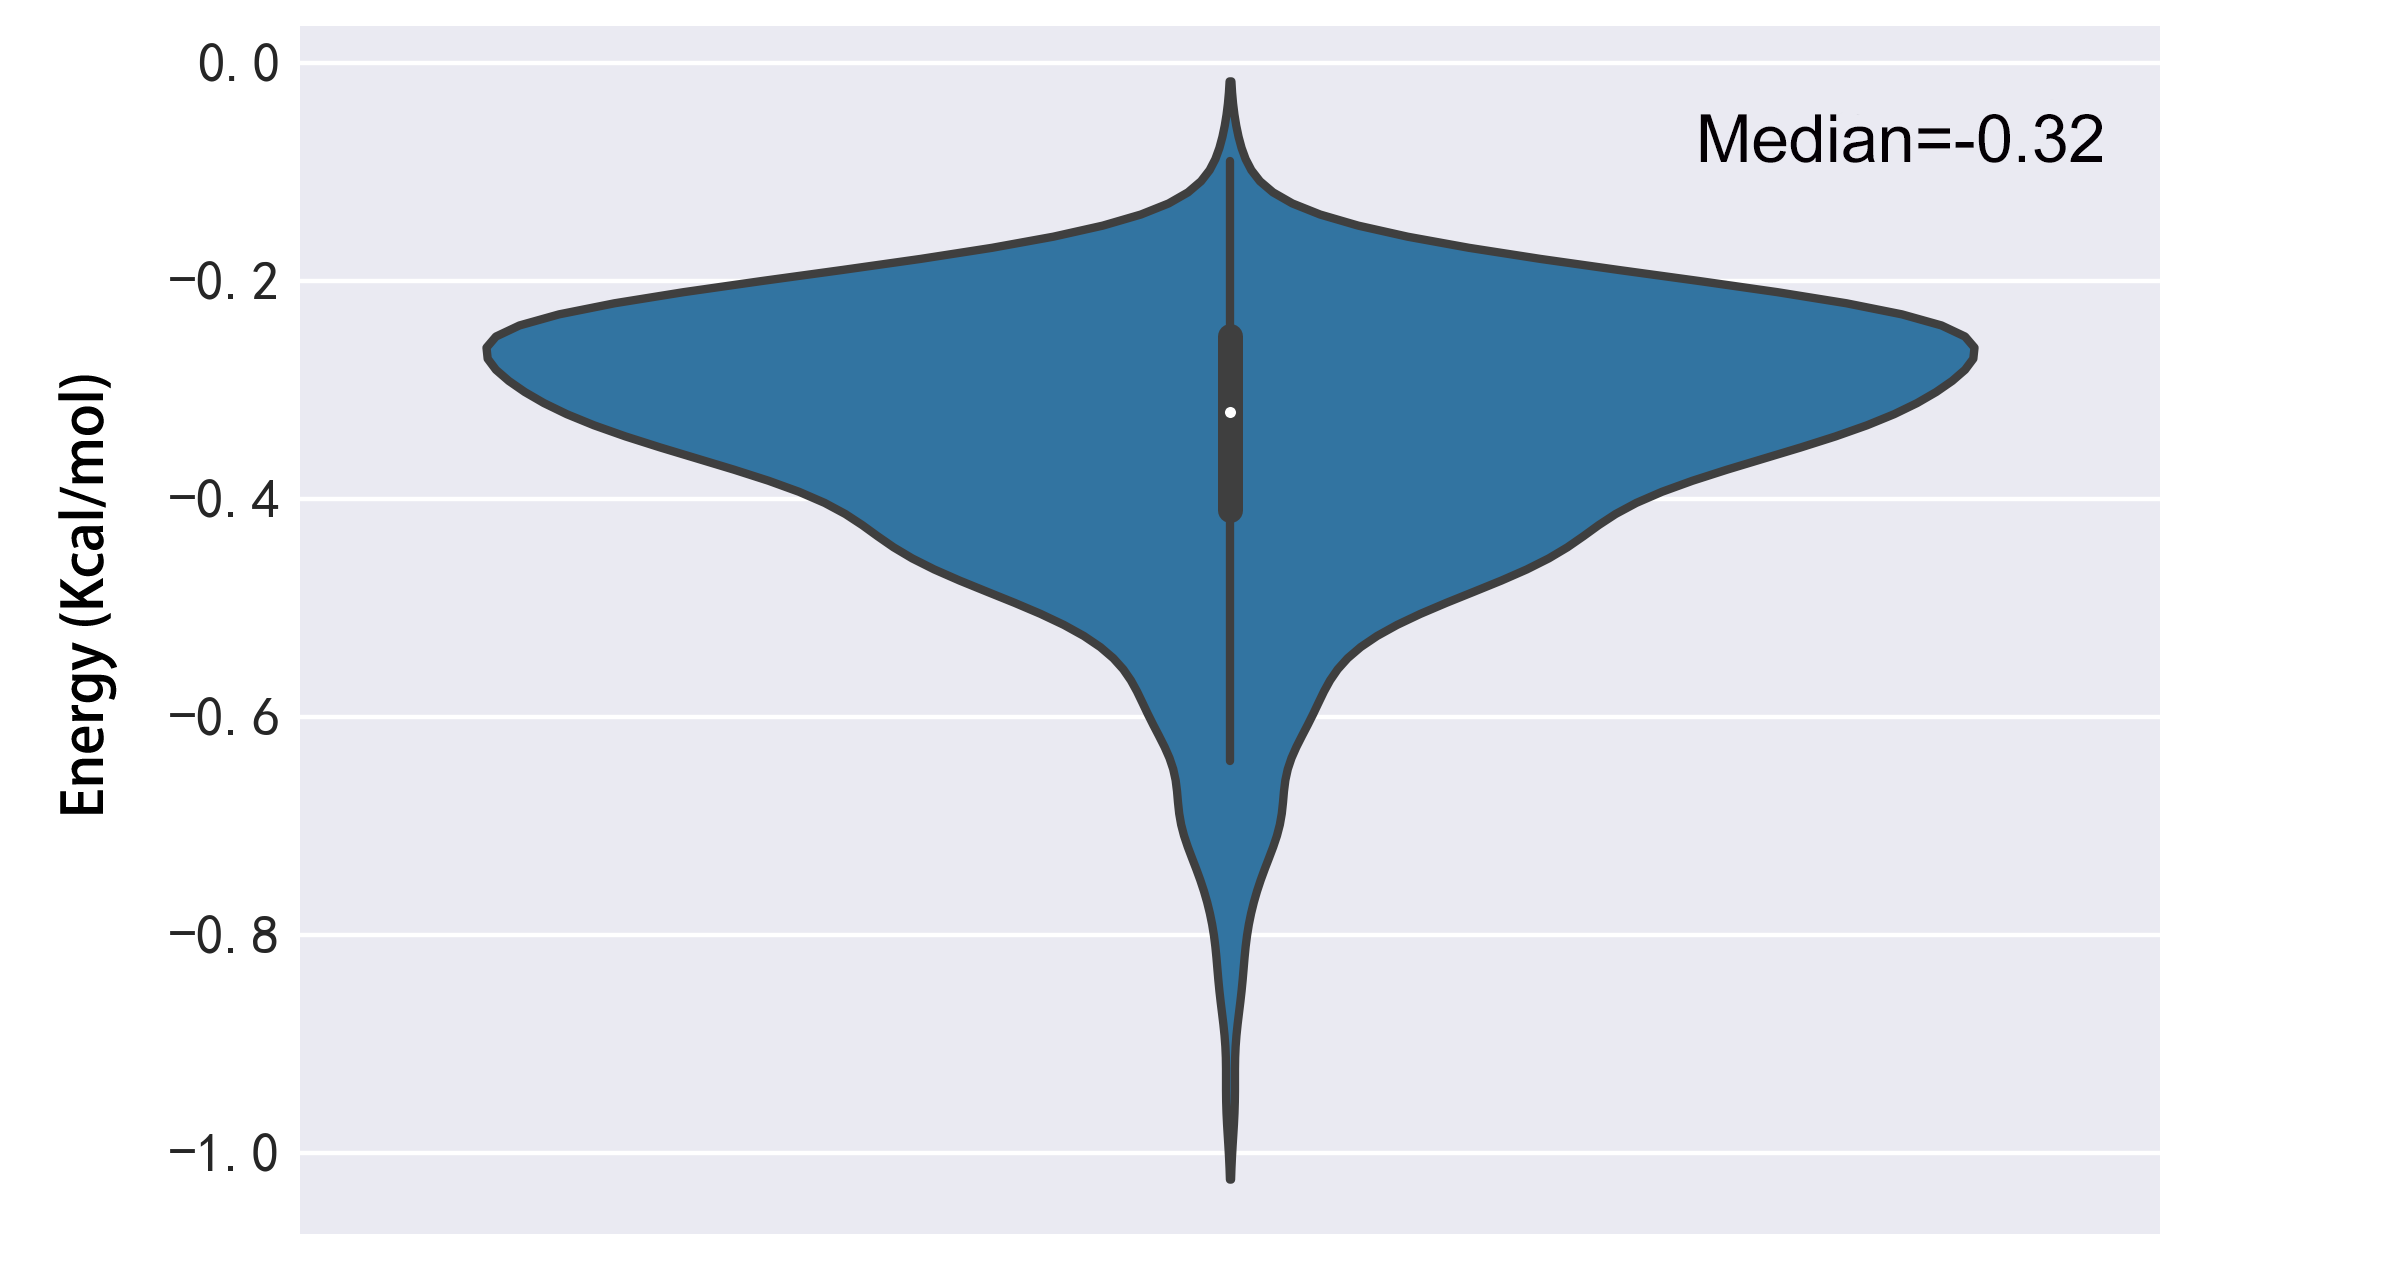


**Figure S2. The violin plot of energies of grid points in phosphate binding sites of 521 phosphate binding proteins.** The median of the energies of grid points is -0.32 kcal/mol, and -032 kcal/mol is used as the energy cutoff to filter the grid points corresponding to unfavorable interaction energies.

Table S1. Bound dataset of phosphate binding proteins

| PDB | PRa | PRNb | PCc | PBCd | Phosphate-binding site | Assemblye | Interfacef | Multimersg | Reference |
| --- | --- | --- | --- | --- | --- | --- | --- | --- | --- |
| 1d4w | PTR | 281 | C | A | R32,S34,E35,S36,C42,R55 | Yes | Yes | Hetero | (P*oy, et a*l., 1999) |
| 1fpr | PTR | 1469 | B | A | S455,S456,A457,R461 | Yes | Yes | Hetero | (Ya*ng, et a*l., 2000) |
| 1fq1 | TPO | 160 | B | A | S140,Y141,G142,G143,G145,R146 | Yes | Yes | Hetero | (So*ng, et a*l., 2001) |
| 1g6g | TPO | 5 | E | A | R70,S85,N86,T106 | Yes | Yes | Hetero | (Duroch*er, et a*l., 2000) |
| 1gxc | TPO | 3 | B | A | R117,S140,K141 | Yes | Yes | Hetero | (*Li, et a*l., 2002) |
| 1h9o | PTR | 1 | B | A | R19,R37,S39,S40 | Yes | Yes | Hetero | (Paupt*it, et a*l., 2001) |
| 1i3z | PTR | 281 | B | A | R31,S33,E34,S35,C41,R54 | Yes | Yes | Hetero | (Mor*ra, et a*l., 2001) |
| 1j4x | PTR | 10 | D | A | D92,S124,R125,E126,G127,Y128,S129,R130 | Yes | Yes | Hetero | (Schumach*er, et a*l., 2002) |
| 1lkk | PTR | 252 | B | A | R154,S156,E157,S158,S164 | Yes | Yes | Hetero | (To*ng, et a*l., 1996) |
| 1ohe | SEP | 2 | B | A | D287,S314,K315,A316,G317,L318,G319,R320 | Yes | Yes | Hetero | (Gr*ay, et a*l., 2003) |
| 1p16 | SEP | 105 | D | B | K152,R157,Y165 | Yes | Yes | Hetero | (Fabre*ga, et a*l., 2003) |
| 1p16 | SEP | 112 | C | B | Y203,H204,K382 | No | Yes | Hetero | (Fabre*ga, et a*l., 2003) |
| 1p16 | SEP | 119 | D | B | R140,K178,K193 | Yes | Yes | Hetero | (Fabre*ga, et a*l., 2003) |
| 1xxp | PTR | 105 | D | A | D356,S403,R404,A405,G406,V407,G408,R409 | Yes | Yes | Hetero | (Ivan*ov, et a*l., 2005) |
| 1xxp | PTR | 105 | C | A | R278,K342,S389 | Yes | Yes | Hetero | (Ivan*ov, et a*l., 2005) |
| 1ygr | PTR | 2004 | C | A | D796,S828,S829,A830,G831,G833,R834,Q872 | Yes | Yes | Hetero | (N*am, et a*l., 2005) |
| 1yrk | PTR | 7 | B | A | K48,H62,R67 | Yes | Yes | Hetero | (Ben*es, et a*l., 2005) |
| 2ast | TPO | 4187 | D | C | K3011,R3020,S3051,W3054 | Yes | Yes | Hetero | (H*ao, et a*l., 2005) |
| 2cia | PTR | 474 | L | A | R292,R311,S313,E314,S315,S321,K334 | Yes | Yes | Hetero | (Fre*se, et a*l., 2006) |
| 2ff4 | TPO | 5 | E | A | R312,S326,R327,S347 | Yes | Yes | Hetero | (Alderwi*ck, et a*l., 2006) |
| 2ght | SEP | 174 | C | A | N96,L97,D98,T152,A153,S154,K190 | Yes | Yes | Hetero | (Zha*ng, et a*l., 2006) |
| 2hdx | PTR | 813 | G | A | R534,R555,R560 | Yes | Yes | Hetero | (Hu and Hubbard, 2006) |
| 2hmh | PTR | 757 | B | A | R71,S73,S74,D75,T81,R94 | Yes | Yes | Hetero | (Bergam*in, et a*l., 2006) |
| 2i6o | PTR | 173 | B | A | D69,S96,V97,G98,G99,I100,G101,R102,Q135 | Yes | Yes | Hetero | (Chu and Wang, 2007) |
| 2oq1 | PTR | 315 | B | A | R19,R39,Y240,K244 | Yes | Yes | Hetero | (Hata*da, et a*l., 1995) |
| 2oq1 | PTR | 304 | B | A | R172,R192,R194 | Yes | Yes | Hetero | (Hata*da, et a*l., 1995) |
| 2ovr | TPO | 62 | C | B | R2465,R2479,R2505,Y2519,Y2545 | Yes | Yes | Hetero | (H*ao, et a*l., 2007) |
| 2pie | TPO | 4 | F | A | R42,S60,R61 | Yes | Yes | Hetero | (Hu*en, et a*l., 2007) |
| 2vif | PTR | 568 | P | A | R409,S411,S412,D413,S419,R432 | Yes | Yes | Hetero | (Zadja*li, et a*l., 2011) |
| 2w3o | TPO | 519 | C | A | R35,S47,R48 | Yes | Yes | Hetero | (A*li, et a*l., 2009) |
| 2z8p | TPO | 183 | B | A | K104,H106,R148,R213,R220 | Yes | Yes | Hetero | (Ch*en, et a*l., 2008) |
| 2z8p | PTR | 185 | B | A | R90,K134,K160 | Yes | Yes | Hetero | (Ch*en, et a*l., 2008) |
| 3al3 | TPO | 1133 | B | A | S1273,S1274,R1280,N1315,K1317 | Yes | Yes | Hetero | (Leu*ng, et a*l., 2011) |
| 3bu6 | PTR | 628 | B | A | D1132,R1136,N1137 | Yes | Yes | Hetero | (*Wu, et a*l., 2008) |
| 3bux | PTR | 1003 | A | B | R294,S296,C297,T298 | Yes | Yes | Hetero | (*Ng, et a*l., 2008) |
| 3d44 | PTR | 185 | B | A | S270,A272,G273,I274,G275,R276,Q314 | Yes | Yes | Hetero | (Critt*on, et a*l., 2008) |
| 3huf | TPO | 79 | E | A | R27,S44,K45 | Yes | Yes | Hetero | (Willia*ms, et a*l., 2009) |
| 3iqu | SEP | 259 | P | A | R56,R129,Y130 | Yes | Yes | Hetero | (Molz*an, et a*l., 2010) |
| 3k05 | SEP | 139 | C | A | T1898,G1899,K1936 | Yes | Yes | Hetero | (Campbe*ll, et a*l., 2010) |
| 3l41 | SEP | 129 | B | A | T672,G673,K710 | Yes | Yes | Hetero | (Willia*ms, et a*l., 2010) |
| 3maz | PTR | 136 | B | A | R184,R203,S206,S212 | Yes | Yes | Hetero | (Kane*ko, et a*l., 2010) |
| 3ml4 | PTR | 553 | E | A | R158,T173,R174 | Yes | Yes | Hetero | (Bergam*in, et a*l., 2010) |
| 3olr | PTR | 394 | E | A | S227,S228,A229,G230,C231,G232,R233 | Yes | Yes | Hetero | (*Yu, et a*l., 2011) |
| 3poa | TPO | 5 | B | A | R29,S43,R44,T64 | Yes | Yes | Hetero | (Penne*ll, et a*l., 2010) |
| 3s3h | PTR | 1 | C | B | K154,A244,Q286 | Yes | Yes | Hetero | (Madan and Gopal, 2011) |
| 3sqd | SEP | 139 | C | A | T872,G873,K913 | Yes | Yes | Hetero | (Y*an, et a*l., 2011) |
| 3t7k | SEP | 129 | C | A | T842,G843,H846,K887 | Yes | Yes | Hetero | (*Li, et a*l., 2012) |
| 3u3z | SEP | 1 | B | A | T653,S654,N696 | Yes | Yes | Hetero | (Sin*gh, et a*l., 2012) |
| 3v7d | SEP | 76 | E | B | R467,R485,R534,Y548 | Yes | Yes | Hetero | (Ta*ng, et a*l., 2012) |
| 3va4 | TPO | 1 | C | B | R58,S72,K73 | Yes | Yes | Hetero | (*Wu, et a*l., 2012) |
| 3vrp | PTR | 1069 | B | A | R264,S266,C267,T268 | Yes | Yes | Hetero | (Takeshi*ta, et a*l., 2012) |
| 3wdz | SEP | 351 | B | A | R415,R483,S508 | Yes | Yes | Hetero | (Ichimu*ra, et a*l., 2013) |
| 3wp0 | SEP | 575 | B | A | R568,R571,Y580,Y609 | Yes | Yes | Hetero | (Z*hu, et a*l., 2014) |
| 4bu0 | TPO | 187 | C | A | T110,N111,R117,K151 | Yes | Yes | Hetero | (*Qu, et a*l., 2013) |
| 4bu0 | TPO | 187 | B | A | T15,S16,K56 | Yes | Yes | Hetero | (*Qu, et a*l., 2013) |
| 4c0o | SEP | 209 | C | A | R671,Y702,R754,R758 | Yes | Yes | Hetero | (Maerte*ns, et a*l., 2014) |
| 4ch2 | PTR | 276 | P | B | R443,K567,K568 | Yes | Yes | Hetero | (Lechtenbe*rg, et a*l., 2014) |
| 4gfu | PTR | 1248 | F | A | S229,S230,A231,G232,C233,G234,R235,Q276 | Yes | Yes | Hetero | (Wa*ng, et a*l., 2014) |
| 4h3k | SEP | 5 | F | E | S12,S13,S14,N15,Q16,N17,R18,D143 | Yes | Yes | Hetero | (Xia*ng, et a*l., 2012) |
| 4icz | PTR | 394 | F | A | S516,A517,G518,I519,G520,R521 | Yes | Yes | Hetero | None |
| 4jiz | SEP | 3 | B | A | K132,R133,R136 | Yes | Yes | Hetero | (Ro*ck, et a*l., 2013) |
| 4jmh | PTR | 239 | B | A | R47,R66,S68,E69,S70,S76,K89 | Yes | Yes | Hetero | (Yas*ui, et a*l., 2014) |
| 4jmh | PTR | 240 | B | A | S21,R22,N23 | Yes | Yes | Hetero | (Yas*ui, et a*l., 2014) |
| 4nm5 | TPO | 1572 | C | A | R96,R180,K205,V214 | Yes | Yes | Hetero | (Stam*os, et a*l., 2014) |
| 4psi | SEP | 29 | D | A | K57,K64,K113 | Yes | Yes | Hetero | (Horej*si, et a*l., 2014) |
| 4r10 | SEP | 1212 | B | A | Y267,R271,R274,R306 | Yes | Yes | Hetero | (Ch*oi, et a*l., 2015) |
| 4rhg | PTR | 849 | B | A | S842,S843,A844,G845,I846,G847,R848 | Yes | Yes | Hetero | (Ch*en, et a*l., 2015) |
| 4roj | PTR | 334 | D | A | R680,R698,R700 | Yes | Yes | Hetero | (L*iu, et a*l., 2016) |
| 4v11 | TPO | 84 | B | A | K314,K326,K328 | Yes | Yes | Hetero | (Zha*ng, et a*l., 2015) |
| 4y5u | PTR | 641 | B | A | K544,R562,S564,D565,S566 | Yes | Yes | Homo | (*Li, et a*l., 2016) |
| 4yos | SEP | 12 | E | A | R869,S876,Y879,R880 | Yes | Yes | Hetero | (Guil*ey, et a*l., 2015) |
| 4zrt | PTR | 4 | B | A | S215,S216,A217,G218,I219,G220,R221 | Yes | Yes | Hetero | (Seln*er, et a*l., 2014) |
| 5caw | SEP | 65 | B | A | H304,R307,Y314 | Yes | Yes | Hetero | (Wau*er, et a*l., 2015) |
| 5df6 | PTR | 378 | B | A | R32,S34,K35,S36,T42 | Yes | Yes | Hetero | (L*iu, et a*l., 2016) |
| 5df6 | PTR | 378 | C | A | R138,S140,Q141,S142 | Yes | Yes | Hetero | (L*iu, et a*l., 2016) |
| 5e2w | SEP | 202 | P | L | N33,Y37,R55 | Yes | Yes | Hetero | (Mal*ia, et a*l., 2016) |
| 5e4h | TPO | 612 | A | B | K684,R734,S735,T736 | No | Yes | Homo | (*Ye, et a*l., 2016) |
| 5e50 | TPO | 233 | D | A | R27,S39,R40,H58 | Yes | Yes | Hetero | (Cher*ry, et a*l., 2015) |
| 5ecg | SEP | 139 | F | C | T1737,M1738,K1773,K1814 | Yes | Yes | Hetero | (Baldo*ck, et a*l., 2015) |
| 5emb | SEP | 590 | B | A | N54,R56,S80 | Yes | Yes | Hetero | (Clairfeuil*le, et a*l., 2016) |
| 5gjh | PTR | 191 | B | A | R65,R83,S85,Q86,S87 | Yes | Yes | Hetero | (Ina*ba, et a*l., 2017) |
| 5gji | PTR | 191 | B | A | R340,R358,S361,T369 | Yes | Yes | Hetero | (Ina*ba, et a*l., 2017) |
| 5hz0 | PTR | 2 | A | B | R195,G197,L221,A222 | Yes | Yes | Hetero | (So*ng, et a*l., 2016) |
| 5jel | SEP | 210 | B | A | R285,H288,H290,K313 | Yes | Yes | Hetero | (Zh*ao, et a*l., 2016) |
| 5tq1 | PTR | 783 | B | A | R675,R694,R696 | Yes | Yes | Hetero | (McKerch*er, et a*l., 2017) |
| 5vko | TPO | 1471 | B | A | G1264,R1282,S1285 | Yes | Yes | Hetero | (Sda*no, et a*l., 2017) |
| 5vko | SEP | 1493 | B | A | K1355,Y1381,K1435 | Yes | Yes | Hetero | (Sda*no, et a*l., 2017) |
| 5xw5 | SEP | 160 | C | A | D253,S283,K284,A285,G286,L287,G288,R289 | Yes | Yes | Hetero | (Kobayashi and Matsuura, 2017) |
| 5yf4 | TPO | 328 | B | A | R161,R162,R165 | Yes | Yes | Hetero | (Ch*en, et a*l., 2018) |
| 5yyz | TPO | 318 | B | A | R51,S66,S67 | Yes | Yes | Hetero | (X*ie, et a*l., 2018) |
| 6ar2 | TPO | 378 | C | A | R32,S52,R53,S75 | Yes | Yes | Hetero | (B*ae, et a*l., 2017) |
| 6dm4 | PTR | 904 | E | A | R266,S268,S269,R296 | Yes | Yes | Hetero | (Kane*ko, et a*l., 2018) |
| 6e8m | PTR | 381 | B | A | R46,S48,S49,T50,T56,R71 | Yes | Yes | Hetero | (Kane*ko, et a*l., 2018) |
| 6glc | SEP | 65 | B | A | K151,H302,R305,Y312 | Yes | Yes | Hetero | (Gladko*va, et a*l., 2018) |
| 6gr8 | SEP | 893 | B | A | T191,P192,S193,R196 | Yes | Yes | Hetero | (Abdul Aze*ez, et a*l., 2019) |
| 6hc1 | TPO | 14 | C | A | R61,S75,R76,T96 | Yes | Yes | Hetero | (Me*ek, et a*l., 2019) |
| 6hm5 | SEP | 387 | B | A | T114,T115,R121,K155 | Yes | Yes | Hetero | (D*ay, et a*l., 2018) |
| 6i2p | TPO | 171 | A | D | R81,S95,R96 | Yes | Yes | Hetero | (Wagn*er, et a*l., 2019) |
| 6i5n | PTR | 0 | I | A | R73,S75,S76,H77,T83,R96 | Yes | Yes | Hetero | (Ku*ng, et a*l., 2019) |
| 6k3f | TPO | 341 | U | A | K12,R26,K296 | Yes | Yes | Hetero | (M*in, et a*l., 2020) |
| 6kc4 | PTR | 3 | B | A | R467,R483,S485,H486,G487 | Yes | Yes | Hetero | (Matsuura, 2019) |
| 6m90 | SEP | 33 | C | A | Y271,R285,S309,S325 | Yes | Yes | Hetero | (Simonet*ta, et a*l., 2019) |
| 6pxc | PTR | 1105 | U | A | R188,R207,S209 | Yes | Yes | Hetero | (Jaber Chehay*eb, et a*l., 2019) |
| 6qhd | PTR | 705 | B | A | R609,S611,E612,S613 | Yes | Yes | Homo | (Be*lo, et a*l., 2019) |
| 6rr0 | TPO | 123 | H | A | R1066,W1068,K1072 | Yes | Yes | Hetero | (Deshpan*de, et a*l., 2019) |
| 6way | PTR | 1087 | V | A | S379,N381,T382,R398,K400 | Yes | Yes | Hetero | (Jaber Chehay*eb, et a*l., 2020) |

aPR: Phosphorylated Residue. bPRN: Phosphorylated Residue Number. cPC: Phosphorylated Chain. dPC: Phospho-Binding Chain. eIs the phosphate binding mode in asymmetric unit consistent with that in biological assembly? fIs the phosphate in the protein-protein interface? gHetero: Hetero-Multimers, and Homo: Homo-Multimers.

**Table S2. Unbound dataset of phosphate binding proteins**

| PDB | PRa | PRNb | PCc | PBCd | Phosphate-binding site | Unbound form |
| --- | --- | --- | --- | --- | --- | --- |
| 1d4w | PTR | C | 281 | A | R32,S34,E35,S36,C42,R55 | 1m27_A |
| 1fq1 | TPO | B | 160 | A | S140,Y141,G142,G143,G145,R146 | 1fpz_F |
| 1g6g | TPO | E | 5 | A | R70,S85,N86,T106 | 5xzw_B |
| 1gxc | TPO | B | 3 | A | R117,S140,K141 | 3i6u_B |
| 1lkk | PTR | B | 252 | A | R154,S156,E157,S158,S164 | 1bhh_A |
| 1xxp | PTR | D | 105 | A | D356,S403,R404,A405,G406,V407,G408,R409 | 1lyv_A |
| 1xxp | PTR | C | 105 | A | R278,K342,S389 | 1lyv_A |
| 2ast | TPO | D | 4187 | C | K3011,R3020,S3051,W3054 | 2ass_C |
| 2ff4 | TPO | E | 5 | A | R312,S326,R327,S347 | 2fez_A |
| 2ght | SEP | C | 174 | A | N96,L97,D98,T152,A153,S154,K190 | 4yh1_B |
| 2hdx | PTR | G | 813 | A | R534,R555,R560 | 2hdv_B |
| 2i6o | PTR | B | 173 | A | D69,S96,V97,G98,G99,I100,G101,R102,Q135 | 2i6p_A |
| 2ovr | TPO | C | 62 | B | R2465,R2479,R2505,Y2519,Y2545 | 2ovp_B |
| 2w3o | TPO | C | 519 | A | R35,S47,R48 | 2brf_A |
| 2z8p | TPO | B | 183 | A | K104,H106,R148,R213,R220 | 4hah_B |
| 2z8p | PTR | B | 185 | A | R90,K134,K160 | 4hah_B |
| 3al3 | TPO | B | 1133 | A | S1273,S1274,R1280,N1315,K1317 | 3al2_A |
| 3bu6 | PTR | B | 628 | A | D1132,R1136,N1137 | 4ibm_B |
| 3bux | PTR | A | 1003 | B | R294,S296,C297,T298 | 5hkw_C |
| 3d44 | PTR | B­ | 185 | A | S270,A272,G273,I274,G275,R276,Q314 | 2qdp_A |
| 3huf | TPO | E | 79 | A | R27,S44,K45 | 3hue_A |
| 3iqu | SEP | P | 259 | A | R56,R129,Y130 | 5oeh_A |
| 3k05 | SEP | C | 139 | A | T1898,G1899,K1936 | 2etx_B |
| 3l41 | SEP | B | 129 | A | T672,G673,K710 | 3l40_B |
| 3olr | PTR | E | 394 | A | S227,S228,A229,G230,C231,G232,R233 | 3brh_B |
| 3poa | TPO | B | 5 | A | R29,S43,R44,T64 | 3po8_A |
| 3s3h | PTR | C | 1 | B | K154,A244,Q286 | 3s3f_B |
| 3t7k | SEP | C | 129 | A | T842,G843,H846,K887 | 3t7j_B |
| 3u3z | SEP | B | 1 | A | T653,S654,N696 | 3sht_C |
| 3v7d | SEP | E | 76 | B | R467,R485,R534,Y548 | 3mks_D |
| 3va4 | TPO | C | 1 | B | R58,S72,K73 | 3va1_B |
| 3vrp | PTR | B | 1069 | A | R264,S266,C267,T268 | 3vrn_A |
| 3wdz | SEP | B | 351 | A | R415,R483,S508 | 4zy3_B |
| 3wp0 | SEP | B | 575 | A | R568,R571,Y580,Y609 | 5gnv_A |
| 4bu0 | TPO | C | 187 | A | T110,N111,R117,K151 | 4bmc_A |
| 4bu0 | TPO | B | 187 | A | T15,S16,K56 | 4bmc_A |
| 4c0o | SEP | C | 209 | A | R671,Y702,R754,R758 | 4c0p_D |
| 4ch2 | PTR | P | 276 | B | R443,K567,K568 | 4nzq_A |
| 4icz | PTR | F | 394 | A | S516,A517,G518,I519,G520,R521 | 4ge6_B |
| 4jiz | SEP | B | 3 | A | K132,R133,R136 | 1pi1_A |
| 4nm5 | TPO | C | 1572 | A | R96,R180,K205,V214 | 4nm0_A |
| 4r10 | SEP | B | 1212 | A | Y267,R271,R274,R306 | 4r0z_A |
| 4rhg | PTR | B | 849 | A | S842,S843,A844,G845,I846,G847,R848 | 4qun_B |
| 4v11 | TPO | B | 84 | A | K314,K326,K328 | 6tz3_A |
| 4yos | SEP | E | 12 | A | R869,S876,Y879,R880 | 4yoz_A |
| 4zrt | PTR | B | 4 | A | S215,S216,A217,G218,I219,G220,R221 | 1i57_A |
| 5e2w | SEP | P | 202 | L | N33,Y37,R55 | 5e2t_L |
| 5e4h | TPO | A | 612 | B | K684,R734,S735,T736 | 5e9e_B |
| 5e50 | TPO | D | 233 | A | R27,S39,R40,H58 | 5w7w_A |
| 5ecg | SEP | F | 139 | C | T1737,M1738,K1773,K1814 | 1kzy_D |
| 5emb | SEP | B | 590 | A | N54,R56,S80 | 3qe1_A |
| 5gji | PTR | B | 191 | A | R340,R358,S361,T369 | 5xgj_B |
| 5jel | SEP | B | 210 | A | R285,H288,H290,K313 | 5jer_G |
| 5tq1 | PTR | B | 783 | A | R675,R694,R696 | 5to4_A |
| 5vko | TPO | B | 1471 | A | G1264,R1282,S1285 | 3psk_D |
| 5vko | SEP | B | 1493 | A | K1355,Y1381,K1435 | 3psk_D |
| 5yyz | TPO | B | 318 | A | R51,S66,S67 | 5yyx_A |
| 6ar2 | TPO | C | 378 | A | R32,S52,R53,S75 | 6ar0_A |
| 6dm4 | PTR | E | 904 | A | R266,S268,S269,R296 | 6dm3_B |
| 6e8m | PTR | B | 381 | A | R46,S48,S49,T50,T56,R71 | 6e8h_A |
| 6glc | SEP | B | 65 | A | K151,H302,R305,Y312 | 4bm9_A |
| 6hc1 | TPO | C | 14 | A | R61,S75,R76,T96 | 6hc0_E |
| 6i5n | PTR | I | 0 | A | R73,S75,S76,H77,T83,R96 | 5bo4_P |
| 6pxc | PTR | U | 1105 | A | R188,R207,S209 | 6pxb_B |
| 6qhd | PTR | B | 705 | A | R609,S611,E612,S613 | 4e68_A |
| 6rr0 | TPO | H | 123 | A | R1066,W1068,K1072 | 6rrv_A |
| 6way | PTR | V | 1087 | A | S379,N381,T382,R398,K400 | 6wax_B |

aPR: Phosphorylated Residue. bPRN: Phosphorylated Residue Number. cPC: Phosphorylated Chain. dPC: Phospho-Binding Chain.


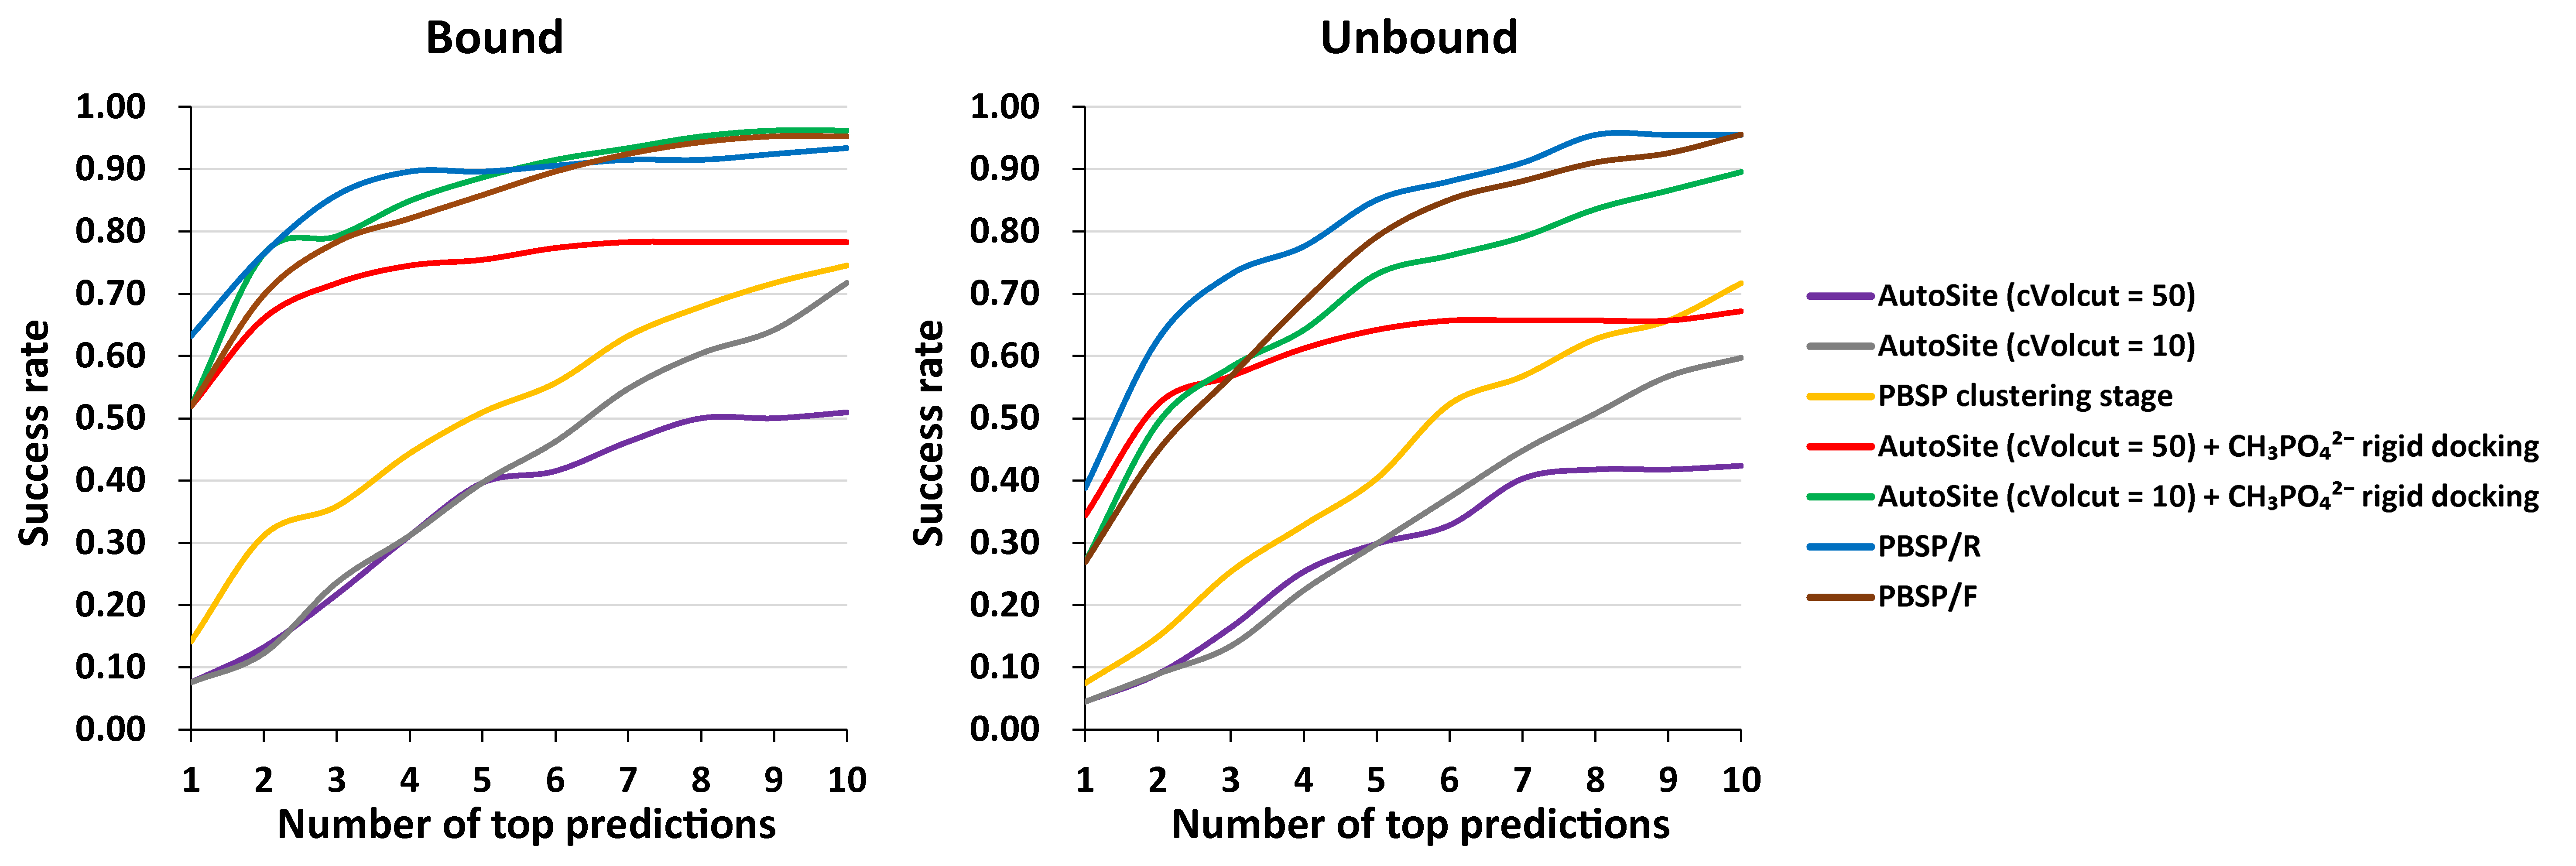


**Figure S3. Success rate comparison of PBSP and AutoSite for phosphate binding site prediction in both bound and unbound dataset from top 1 to 10 prediction.**

**Table S3. Number of the potential phosphate binding pockets (site**s) per protein in bound dataset

| PDB ID | PBSP  (clustering stage) | AutoSite  (cVolcut=50) | AutoSite  (cVolcut=10) |
| --- | --- | --- | --- |
| 1d4w | 26 | 22 | 6 |
| 1fpr | 70 | 61 | 14 |
| 1fq1 | 49 | 29 | 5 |
| 1g6g | 35 | 27 | 1 |
| 1gxc | 32 | 18 | 2 |
| 1h9o | 32 | 20 | 3 |
| 1i3z | 31 | 19 | 4 |
| 1j4x | 44 | 31 | 3 |
| 1lkk | 28 | 28 | 2 |
| 1ohe | 82 | 60 | 12 |
| 1p16 | 100 | 80 | 22 |
| 1p16 | 100 | 80 | 22 |
| 1p16 | 100 | 80 | 22 |
| 1xxp | 51 | 45 | 11 |
| 1xxp | 51 | 45 | 11 |
| 1ygr | 139 | 114 | 32 |
| 1yrk | 36 | 22 | 2 |
| 2ast | 20 | 15 | 1 |
| 2cia | 30 | 18 | 5 |
| 2ff4 | 73 | 63 | 18 |
| 2ght | 50 | 32 | 6 |
| 2hdx | 27 | 16 | 5 |
| 2hmh | 32 | 24 | 7 |
| 2i6o | 46 | 26 | 3 |
| 2oq1 | 51 | 39 | 12 |
| 2oq1 | 51 | 39 | 12 |
| 2ovr | 107 | 78 | 19 |
| 2pie | 31 | 21 | 7 |
| 2vif | 33 | 24 | 5 |
| 2w3o | 25 | 19 | 3 |
| 2z8p | 47 | 47 | 17 |
| 2z8p | 47 | 47 | 17 |
| 3al3 | 58 | 35 | 9 |
| 3bu6 | 64 | 52 | 14 |
| 3bux | 69 | 56 | 19 |
| 3d44 | 64 | 52 | 16 |
| 3huf | 70 | 55 | 9 |
| 3iqu | 65 | 37 | 6 |
| 3k05 | 52 | 31 | 5 |
| 3l41 | 58 | 42 | 7 |
| 3maz | 28 | 24 | 4 |
| 3ml4 | 51 | 34 | 14 |
| 3olr | 68 | 51 | 14 |
| 3poa | 22 | 21 | 1 |
| 3s3h | 62 | 50 | 13 |
| 3sqd | 56 | 39 | 10 |
| 3t7k | 68 | 49 | 11 |
| 3u3z | 43 | 37 | 6 |
| 3v7d | 108 | 76 | 16 |
| 3va4 | 27 | 16 | 2 |
| 3vrp | 64 | 58 | 12 |
| 3wdz | 62 | 48 | 3 |
| 3wp0 | 44 | 34 | 9 |
| 4bu0 | 40 | 33 | 5 |
| 4bu0 | 40 | 33 | 5 |
| 4c0o | 208 | 150 | 32 |
| 4ch2 | 55 | 48 | 12 |
| 4gfu | 53 | 46 | 9 |
| 4h3k | 56 | 32 | 8 |
| 4icz | 52 | 44 | 8 |
| 4jiz | 41 | 29 | 8 |
| 4jmh | 51 | 43 | 5 |
| 4jmh | 51 | 43 | 5 |
| 4nm5 | 71 | 67 | 21 |
| 4psi | 33 | 27 | 6 |
| 4r10 | 117 | 97 | 14 |
| 4rhg | 65 | 52 | 12 |
| 4roj | 26 | 19 | 1 |
| 4v11 | 39 | 30 | 4 |
| 4y5u | 97 | 83 | 24 |
| 4yos | 79 | 59 | 18 |
| 4zrt | 71 | 47 | 12 |
| 5caw | 66 | 47 | 11 |
| 5df6 | 47 | 36 | 7 |
| 5df6 | 47 | 36 | 7 |
| 5e2w | 58 | 41 | 5 |
| 5e4h | 60 | 47 | 14 |
| 5e50 | 27 | 21 | 5 |
| 5ecg | 57 | 40 | 6 |
| 5emb | 22 | 17 | 2 |
| 5gjh | 28 | 16 | 5 |
| 5gji | 25 | 15 | 5 |
| 5hz0 | 137 | 97 | 17 |
| 5jel | 51 | 48 | 11 |
| 5tq1 | 28 | 23 | 4 |
| 5vko | 49 | 47 | 9 |
| 5vko | 49 | 47 | 9 |
| 5xw5 | 76 | 60 | 15 |
| 5yf4 | 34 | 22 | 5 |
| 5yyz | 25 | 17 | 2 |
| 6ar2 | 34 | 23 | 4 |
| 6dm4 | 32 | 28 | 5 |
| 6e8m | 50 | 42 | 9 |
| 6glc | 71 | 47 | 14 |
| 6gr8 | 55 | 48 | 13 |
| 6hc1 | 22 | 14 | 1 |
| 6hm5 | 59 | 35 | 9 |
| 6i2p | 25 | 18 | 3 |
| 6i5n | 39 | 33 | 6 |
| 6k3f | 101 | 71 | 19 |
| 6kc4 | 27 | 17 | 5 |
| 6m90 | 86 | 65 | 9 |
| 6pxc | 26 | 17 | 6 |
| 6qhd | 124 | 90 | 23 |
| 6rr0 | 26 | 17 | 6 |
| 6way | 36 | 25 | 1 |
| Average | 54.9 | 41.8 | 9.4 |

Table S4. Number of the potential phosphate binding sites (clusters) per protein in unbound dataset

| PDB ID | Unbound  (PDB ID) | PBSP  (clustering stage) | AutoSite (cVolcut=50) | AutoSite (cVolcut=10) |
| --- | --- | --- | --- | --- |
| 1d4w | 1m27_A | 34 | 23 | 4 |
| 1fq1 | 1fpz_F | 40 | 23 | 8 |
| 1g6g | 5xzw_B | 31 | 19 | 2 |
| 1gxc | 3i6u_B | 28 | 16 | 2 |
| 1lkk | 1bhh_A | 26 | 19 | 5 |
| 1xxp | 1lyv_A | 54 | 45 | 12 |
| 1xxp | 1lyv_A | 54 | 45 | 12 |
| 2ast | 2ass_C | 22 | 16 | 5 |
| 2ff4 | 2fez_A | 67 | 56 | 19 |
| 2ght | 4yh1_B | 42 | 31 | 7 |
| 2hdx | 2hdv_B | 27 | 23 | 4 |
| 2i6o | 2i6p_A | 38 | 24 | 3 |
| 2ovr | 2ovp_B | 98 | 80 | 19 |
| 2w3o | 2brf_A | 30 | 19 | 4 |
| 2z8p | 4hah_B | 44 | 41 | 8 |
| 2z8p | 4hah_B | 44 | 41 | 8 |
| 3al3 | 3al2_A | 55 | 49 | 8 |
| 3bu6 | 4ibm_B | 62 | 57 | 13 |
| 3bux | 5hkw_C | 67 | 54 | 15 |
| 3d44 | 2qdp_A | 77 | 57 | 16 |
| 3huf | 3hue_A | 83 | 52 | 15 |
| 3iqu | 5oeh_A | 56 | 35 | 7 |
| 3k05 | 2etx_B | 55 | 33 | 5 |
| 3l41 | 3l40_B | 51 | 41 | 5 |
| 3olr | 3brh_B | 65 | 57 | 14 |
| 3poa | 3po8_A | 29 | 15 | 3 |
| 3s3h | 3s3f_B | 59 | 55 | 11 |
| 3t7k | 3t7j_B | 64 | 49 | 11 |
| 3u3z | 3sht_C | 46 | 36 | 6 |
| 3v7d | 3mks_D | 97 | 78 | 18 |
| 3va4 | 3va1_B | 26 | 20 | 1 |
| 3vrp | 3vrn_A | 65 | 59 | 13 |
| 3wdz | 4zy3_B | 67 | 42 | 4 |
| 3wp0 | 5gnv_A | 37 | 27 | 9 |
| 4bu0 | 4bmc_A | 41 | 33 | 8 |
| 4bu0 | 4bmc_A | 41 | 33 | 8 |
| 4c0o | 4c0p_D | 195 | 149 | 37 |
| 4ch2 | 4nzq_A | 55 | 56 | 16 |
| 4icz | 4ge6_B | 63 | 53 | 15 |
| 4jiz | 1pi1_A | 45 | 41 | 8 |
| 4nm5 | 4nm0_A | 73 | 56 | 21 |
| 4r10 | 4r0z_A | 129 | 98 | 18 |
| 4rhg | 4qun_B | 67 | 50 | 6 |
| 4v11 | 6tz3_A | 41 | 30 | 5 |
| 4yos | 4yoz_A | 79 | 56 | 15 |
| 4zrt | 1i57_A | 57 | 47 | 16 |
| 5e2w | 5e2t_L | 56 | 34 | 2 |
| 5e4h | 5e9e_B | 58 | 51 | 13 |
| 5e50 | 5w7w_A | 29 | 17 | 3 |
| 5ecg | 1kzy_D | 64 | 45 | 14 |
| 5emb | 3qe1_A | 27 | 17 | 3 |
| 5gji | 5xgj_B | 29 | 16 | 7 |
| 5jel | 5jer_G | 54 | 43 | 10 |
| 5tq1 | 5to4_A | 28 | 21 | 1 |
| 5vko | 3psk_D | 47 | 40 | 7 |
| 5vko | 3psk_D | 47 | 40 | 7 |
| 5yyz | 5yyx_A | 32 | 20 | 6 |
| 6ar2 | 6ar0_A | 36 | 23 | 5 |
| 6dm4 | 6dm3_B | 32 | 26 | 2 |
| 6e8m | 6e8h_A | 46 | 35 | 9 |
| 6glc | 4bm9_A | 62 | 45 | 15 |
| 6hc1 | 6hc0_E | 27 | 19 | 1 |
| 6i5n | 5bo4_P | 41 | 26 | 6 |
| 6pxc | 6pxb_B | 30 | 23 | 3 |
| 6qhd | 4e68_A | 125 | 93 | 24 |
| 6rr0 | 6rrv_A | 35 | 21 | 5 |
| 6way | 6wax_B | 33 | 20 | 1 |
| Average | - | 53.2 | 40.5 | 9.1 |

**Table S5. Prediction speed**

| Method | PBSP/R  (2.5 Ma) | PBSP/F  (2.5 M) | PBSP/R  (0.25 M) | PBSP/F  (0.25 M) | - |
| --- | --- | --- | --- | --- | --- |
| Timeb | 55.4 min | 120.3 min | 7.8 min | 13.4 min | - |
| Method | SiteHound | LISE | MSpocket | P2Rank | Fpocket |
| Timec | 14.3 s | 42.6 min | 15.3 s | 8.4 s | 7.7 s |

a The maximum number of evaluations of the scoring function per genetic algorithm in PBSP. M is short for million. The maximum number of evaluations do not affect the performance of PBSP (**Figure S5**).

b Average time required for binding site prediction on a single protein with about 300 residues, and the methods were tested in parallel on 32 2.8 GHz CPU cores.

c Average time required for binding site prediction on a single protein with about 300 residues, and the methods were tested on a single 2.8 GHz CPU core.

Table S6. The termination status of GA (genetic algorithm) evolutions in PBSP

| Termination status | PBSP/R  (0.25 Ma) | PBSP/R  (2.5 M) | PBSP/R  (25 M) | PBSP/F  (0.25 M) | PBSP/F  (2.5 M) | PBSP/F  (25 M) |
| --- | --- | --- | --- | --- | --- | --- |
| failed | 0.0% | 0.0% | 0.0% | 0.0% | 0.0% | 0.0% |
| exhausted their evaluations | 99.4% | 87.5% | 0.8% | 99.6% | 80.5% | 0.7% |
| stopped converged 1 or 2 clusters | 0.2% | 0.2% | 0.2% | 0.0% | 0.0% | 0.0% |
| stopped after no improvement in clusters | 0.4% | 12.3% | 99.0% | 0.4% | 19.5% | 99.3% |
| stopped because GA ran out of choices | 0.0% | 0.0% | 0.0% | 0.0% | 0.0% | 0.0% |
| stopped because GA population converged | 0.0% | 0.0% | 0.0% | 0.0% | 0.0% | 0.0% |

a The maximum number of evaluations of the scoring function per GA. M is short for million. The default number of evaluations of the scoring function is 2.5 M.


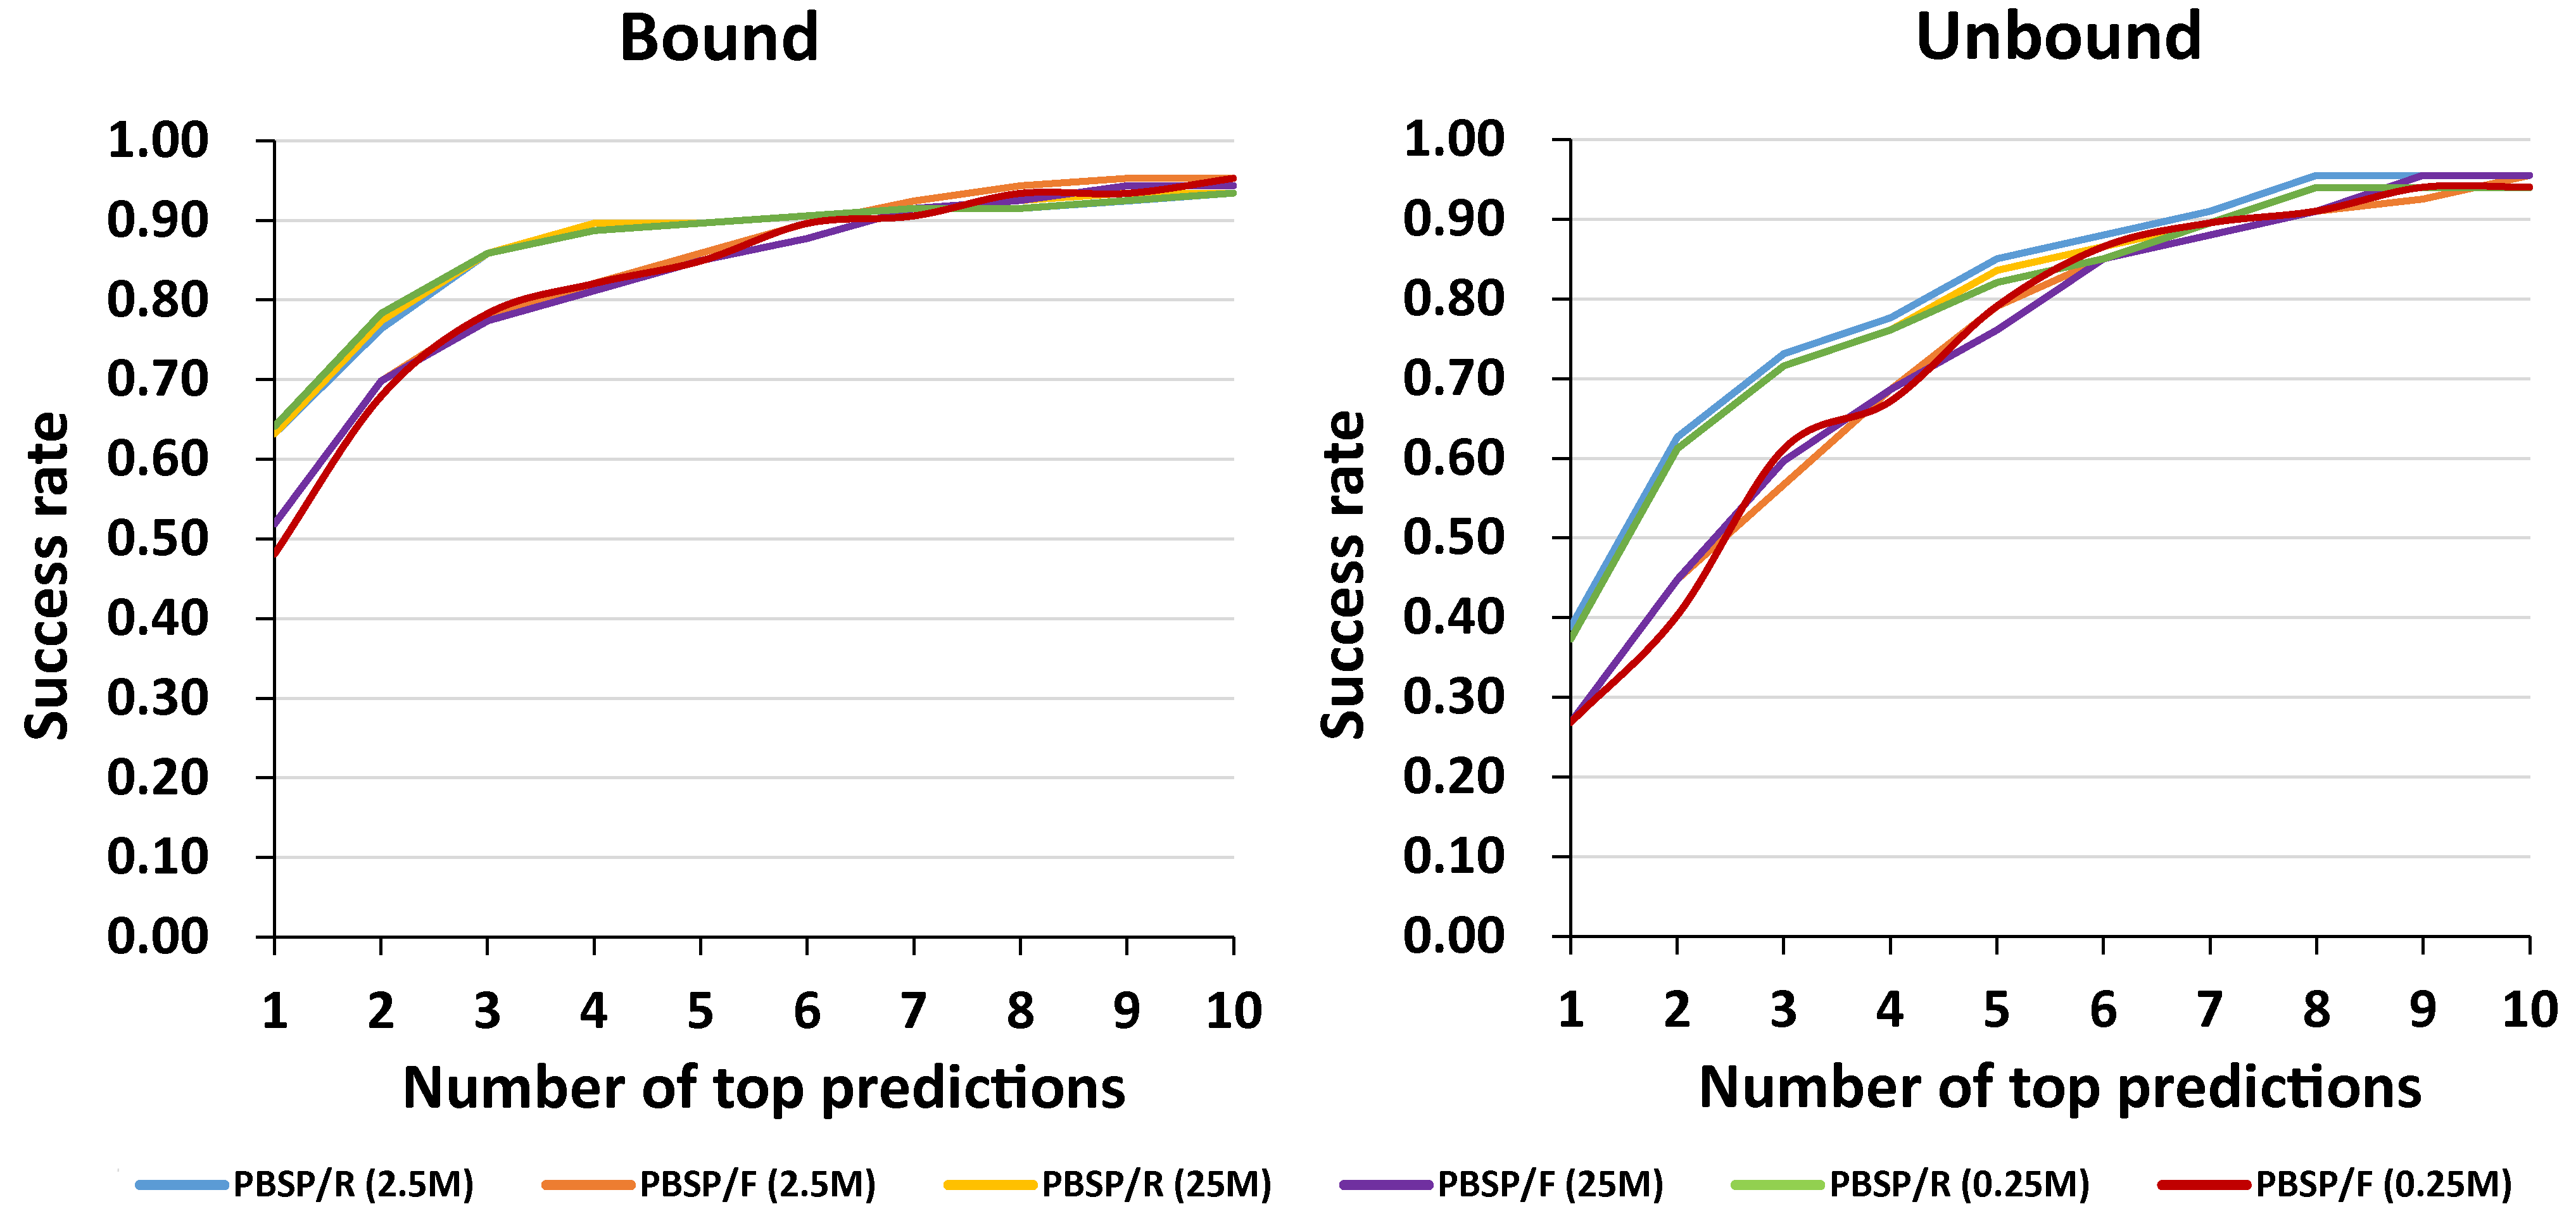


**Figure S4. Success rate comparison of converged and non-converged results of PBSP for phosphate binding site prediction in both bound and unbound dataset from top 1 to 10 prediction.**

**Table S7.** Reasons for the unsuccessful predictions by PBSP

| Model | Dataset | PDB IDa | Phospho- residuesb | Phosphate binding sites | Categoryc |
| --- | --- | --- | --- | --- | --- |
| PBSP/R | Bound | 3s3h | C: pY1 | K154, A244, Q286 | (ⅰ) |
| 1p16 | C: pS112 | K382, Y203, H204 | (ⅳ) |
| 5caw | B: pS65 | R307, Y314, H304 | (ⅳ) |
| 4yos | E: pS12 | R869, R880, S876, Y879 | (ⅱ) |
| 5e2w | P: pS202 | R55, Y37, N33 | (ⅱ) |
| 3t7k | C: pS129 | K887, T842, G843, H846 | (ⅱ) |
| 4bu0 | B: pT187 | K56, S16, T15 | (ⅳ) |
| Unbound | 4icz (4ge6) | F: pY394 | R521, S516, G518, G520, A517, I519 | (ⅰ) (ⅲ) |
| 3bu6 (4ibm) | B: pY628 | R1136, N1137, D1132 | (ⅳ) |
| 4ch2 (4nzq) | P: pY276 | R443, K567, K568 | (ⅱ) (ⅲ) |
| 3t7k (3t7j) | C: pS129 | K887, T842, G843, H846 | (ⅱ) |
| PBSP/F | Bound | 3t7k | C: pS129 | K887, T842, G843, H846 | (ⅰ) (ⅱ) |
| 4gfu | F: pY1248 | R235, S229, S230, G232, G234, C233, A231, Q276 | (ⅰ) |
| 1p16 | C: pS112 | K382, Y203, H204 | (ⅳ) |
| 2ff4 | E: pT5 | R312, R327, S326, S347 | (ⅳ) |
| 6gr8 | B: pS893 | R196, S193, T191, P192 | (ⅱ) |
| Unbound | 3wdz (4zy3) | B: pS351 | R415, R483, S508 | (ⅰ) |
| 6qhd (4e68) | B: pY705 | R609, S611, S613, E612 | (ⅳ) |
| 3bu6 (4ibm) | B: pY628 | R1136, N1137, D1132 | (ⅲ) |

a The PDB ID of bound form phosphate-binding protein. The PDB ID of unbound form is in bracket.

b The phosphorylated residue in crystal structure.

c The category of unsuccessful cases. (ⅰ): the binding pocket was identified but not the precise phosphate-binding sites; (ⅱ): the true phosphate binding site does not rank in the top 10 prediction; (ⅲ): conformational changes of unbound form structure; (ⅳ): a small phosphate binding site.

**Reference**

Abdul Azeez, K.R.*, et al.* (2019) Structural mechanism of synergistic activation of Aurora kinase B/C by phosphorylated INCENP. *Nat Commun,* 10(1):3166.

Alderwick, L.J.*, et al.* (2006) Molecular structure of EmbR, a response element of Ser/Thr kinase signaling in Mycobacterium tuberculosis. *Proc Natl Acad Sci U S A,* 103(8):2558-2563.

Ali, A.A.*, et al.* (2009) Specific recognition of a multiply phosphorylated motif in the DNA repair scaffold XRCC1 by the FHA domain of human PNK. *Nucleic Acids Res,* 37(5):1701-1712.

Bae, S.J.*, et al.* (2017) SAV1 promotes Hippo kinase activation through antagonizing the PP2A phosphatase STRIPAK. *Elife,* 6.

Baldock, R.A.*, et al.* (2015) ATM Localization and Heterochromatin Repair Depend on Direct Interaction of the 53BP1-BRCT2 Domain with gammaH2AX. *Cell Rep,* 13(10):2081-2089.

Belo, Y.*, et al.* (2019) Unexpected implications of STAT3 acetylation revealed by genetic encoding of acetyl-lysine. *Biochim Biophys Acta Gen Subj,* 1863(9):1343-1350.

Benes, C.H.*, et al.* (2005) The C2 domain of PKCdelta is a phosphotyrosine binding domain. *Cell,* 121(2):271-280.

Bergamin, E.*, et al.* (2010) The cytoplasmic adaptor protein Dok7 activates the receptor tyrosine kinase MuSK via dimerization. *Mol Cell,* 39(1):100-109.

Bergamin, E.*, et al.* (2006) Structural basis for phosphotyrosine recognition by suppressor of cytokine signaling-3. *Structure,* 14(8):1285-1292.

Campbell, S.J.*, et al.* (2010) Comparison of the structures and peptide binding specificities of the BRCT domains of MDC1 and BRCA1. *Structure,* 18(2):167-176.

Chen, K.E.*, et al.* (2015) Substrate specificity and plasticity of FERM-containing protein tyrosine phosphatases. *Structure,* 23(4):653-664.

Chen, L.*, et al.* (2008) Structural basis for the catalytic mechanism of phosphothreonine lyase. *Nat Struct Mol Biol,* 15(1):101-102.

Chen, M.*, et al.* (2018) The MST4-MOB4 complex disrupts the MST1-MOB1 complex in the Hippo-YAP pathway and plays a pro-oncogenic role in pancreatic cancer. *J Biol Chem,* 293(37):14455-14469.

Cherry, A.L.*, et al.* (2015) Versatility in phospho-dependent molecular recognition of the XRCC1 and XRCC4 DNA-damage scaffolds by aprataxin-family FHA domains. *DNA Repair (Amst),* 35:116-125.

Choi, H.J.*, et al.* (2015) A conserved phosphorylation switch controls the interaction between cadherin and beta-catenin in vitro and in vivo. *Dev Cell,* 33(1):82-93.

Chu, H.M. and Wang, A.H. (2007) Enzyme-substrate interactions revealed by the crystal structures of the archaeal Sulfolobus PTP-fold phosphatase and its phosphopeptide complexes. *Proteins,* 66(4):996-1003.

Clairfeuille, T.*, et al.* (2016) A molecular code for endosomal recycling of phosphorylated cargos by the SNX27-retromer complex. *Nat Struct Mol Biol,* 23(10):921-932.

Critton, D.A.*, et al.* (2008) Structural basis of substrate recognition by hematopoietic tyrosine phosphatase. *Biochemistry,* 47(50):13336-13345.

Day, M.*, et al.* (2018) BRCT domains of the DNA damage checkpoint proteins TOPBP1/Rad4 display distinct specificities for phosphopeptide ligands. *Elife,* 7.

Deshpande, I.*, et al.* (2019) The Sir4 H-BRCT domain interacts with phospho-proteins to sequester and repress yeast heterochromatin. *EMBO J,* 38(20):e101744.

Durocher, D.*, et al.* (2000) The molecular basis of FHA domain:phosphopeptide binding specificity and implications for phospho-dependent signaling mechanisms. *Mol Cell,* 6(5):1169-1182.

Fabrega, C.*, et al.* (2003) Structure of an mRNA Capping Enzyme Bound to the Phosphorylated Carboxy-Terminal Domain of RNA Polymerase II. *Molecular Cell,* 11(6):1549-1561.

Frese, S.*, et al.* (2006) The phosphotyrosine peptide binding specificity of Nck1 and Nck2 Src homology 2 domains. *J Biol Chem,* 281(26):18236-18245.

Gladkova, C.*, et al.* (2018) Mechanism of parkin activation by PINK1. *Nature,* 559(7714):410-414.

Gray, C.H.*, et al.* (2003) The structure of the cell cycle protein Cdc14 reveals a proline-directed protein phosphatase. *Embo j,* 22(14):3524-3535.

Guiley, K.Z.*, et al.* (2015) Structural mechanisms of DREAM complex assembly and regulation. *Genes Dev,* 29(9):961-974.

Hao, B.*, et al.* (2007) Structure of a Fbw7-Skp1-cyclin E complex: multisite-phosphorylated substrate recognition by SCF ubiquitin ligases. *Mol Cell,* 26(1):131-143.

Hao, B.*, et al.* (2005) Structural basis of the Cks1-dependent recognition of p27(Kip1) by the SCF(Skp2) ubiquitin ligase. *Mol Cell,* 20(1):9-19.

Hatada, M.H.*, et al.* (1995) Molecular basis for interaction of the protein tyrosine kinase ZAP-70 with the T-cell receptor. *Nature,* 377(6544):32-38.

Horejsi, Z.*, et al.* (2014) Phosphorylation-dependent PIH1D1 interactions define substrate specificity of the R2TP cochaperone complex. *Cell Rep,* 7(1):19-26.

Hu, J. and Hubbard, S.R. (2006) Structural basis for phosphotyrosine recognition by the Src homology-2 domains of the adapter proteins SH2-B and APS. *J Mol Biol,* 361(1):69-79.

Huen, M.S.*, et al.* (2007) RNF8 transduces the DNA-damage signal via histone ubiquitylation and checkpoint protein assembly. *Cell,* 131(5):901-914.

Ichimura, Y.*, et al.* (2013) Phosphorylation of p62 activates the Keap1-Nrf2 pathway during selective autophagy. *Mol Cell,* 51(5):618-631.

Inaba, S.*, et al.* (2017) Crystal Structures and Thermodynamic Analysis Reveal Distinct Mechanisms of CD28 Phosphopeptide Binding to the Src Homology 2 (SH2) Domains of Three Adaptor Proteins. *J Biol Chem,* 292(3):1052-1060.

Ivanov, M.I.*, et al.* (2005) Two substrate-targeting sites in the Yersinia protein tyrosine phosphatase co-operate to promote bacterial virulence. *Mol Microbiol,* 55(5):1346-1356.

Jaber Chehayeb, R.*, et al.* (2019) Crystal structures of p120RasGAP N-terminal SH2 domain in its apo form and in complex with a p190RhoGAP phosphotyrosine peptide. *PLoS One,* 14(12):e0226113.

Jaber Chehayeb, R.*, et al.* (2020) The GTPase-activating protein p120RasGAP has an evolutionarily conserved "FLVR-unique" SH2 domain. *J Biol Chem,* 295(31):10511-10521.

Kaneko, T.*, et al.* (2010) Loops govern SH2 domain specificity by controlling access to binding pockets. *Science signaling,* 3(120):ra34.

Kaneko, T.*, et al.* (2018) Identification and characterization of a large family of superbinding bacterial SH2 domains. *Nat Commun,* 9(1):4549.

Kobayashi, J. and Matsuura, Y. (2017) Structure and dimerization of the catalytic domain of the protein phosphatase Cdc14p, a key regulator of mitotic exit in Saccharomyces cerevisiae. *Protein Sci,* 26(10):2105-2112.

Kung, W.W.*, et al.* (2019) Structural insights into substrate recognition by the SOCS2 E3 ubiquitin ligase. *Nat Commun,* 10(1):2534.

Lechtenberg, B.C.*, et al.* (2014) GpIbalpha interacts exclusively with exosite II of thrombin. *J Mol Biol,* 426(4):881-893.

Leung, C.C.*, et al.* (2011) Molecular basis of BACH1/FANCJ recognition by TopBP1 in DNA replication checkpoint control. *J Biol Chem,* 286(6):4292-4301.

Li, J.*, et al.* (2016) Structural basis for DNA recognition by STAT6. *Proc Natl Acad Sci U S A,* 113(46):13015-13020.

Li, J.*, et al.* (2002) Structural and functional versatility of the FHA domain in DNA-damage signaling by the tumor suppressor kinase Chk2. *Mol Cell,* 9(5):1045-1054.

Li, X.*, et al.* (2012) Structure of C-terminal tandem BRCT repeats of Rtt107 protein reveals critical role in interaction with phosphorylated histone H2A during DNA damage repair. *J Biol Chem,* 287(12):9137-9146.

Liu, S.*, et al.* (2016) Structural basis for a novel interaction between TXNIP and Vav2. *FEBS Lett,* 590(6):857-865.

Liu, Y.*, et al.* (2016) Structural basis for the regulatory role of the PPxY motifs in the thioredoxin-interacting protein TXNIP. *Biochem J,* 473(2):179-187.

Madan, L.L. and Gopal, B. (2011) Conformational basis for substrate recruitment in protein tyrosine phosphatase 10D. *Biochemistry,* 50(46):10114-10125.

Maertens, G.N.*, et al.* (2014) Structural basis for nuclear import of splicing factors by human Transportin 3. *Proc Natl Acad Sci U S A,* 111(7):2728-2733.

Malia, T.J.*, et al.* (2016) Epitope mapping and structural basis for the recognition of phosphorylated tau by the anti-tau antibody AT8. *Proteins,* 84(4):427-434.

Matsuura, Y. (2019) High-resolution structural analysis shows how different crystallographic environments can induce alternative modes of binding of a phosphotyrosine peptide to the SH2 domain of Fer tyrosine kinase. *Protein Sci,* 28(11):2011-2019.

McKercher, M.A.*, et al.* (2017) Multimodal Recognition of Diverse Peptides by the C-Terminal SH2 Domain of Phospholipase C-gamma1 Protein. *Biochemistry,* 56(16):2225-2237.

Meek, R.W.*, et al.* (2019) Structural basis for activation of a diguanylate cyclase required for bacterial predation in Bdellovibrio. *Nat Commun,* 10(1):4086.

Min, K.*, et al.* (2020) Crystal Structure of beta-Arrestin 2 in Complex with CXCR7 Phosphopeptide. *Structure,* 28(9):1014-1023 e1014.

Molzan, M.*, et al.* (2010) Impaired binding of 14-3-3 to C-RAF in Noonan syndrome suggests new approaches in diseases with increased Ras signaling. *Mol Cell Biol,* 30(19):4698-4711.

Morra, M.*, et al.* (2001) Structural basis for the interaction of the free SH2 domain EAT-2 with SLAM receptors in hematopoietic cells. *Embo j,* 20(21):5840-5852.

Nam, H.J.*, et al.* (2005) Structural basis for the function and regulation of the receptor protein tyrosine phosphatase CD45. *J Exp Med,* 201(3):441-452.

Ng, C.*, et al.* (2008) Structural basis for a novel intrapeptidyl H-bond and reverse binding of c-Cbl-TKB domain substrates. *EMBO J,* 27(5):804-816.

Pauptit, R.A.*, et al.* (2001) NMR trial models: experiences with the colicin immunity protein Im7 and the p85alpha C-terminal SH2-peptide complex. *Acta crystallographica. Section D, Biological crystallography,* 57(Pt 10):1397-1404.

Pennell, S.*, et al.* (2010) Structural and functional analysis of phosphothreonine-dependent FHA domain interactions. *Structure,* 18(12):1587-1595.

Poy, F.*, et al.* (1999) Crystal structures of the XLP protein SAP reveal a class of SH2 domains with extended, phosphotyrosine-independent sequence recognition. *Mol Cell,* 4(4):555-561.

Qu, M.*, et al.* (2013) Phosphorylation-dependent assembly and coordination of the DNA damage checkpoint apparatus by Rad4(TopBP1). *Mol Cell,* 51(6):723-736.

Rock, J.M.*, et al.* (2013) Activation of the yeast Hippo pathway by phosphorylation-dependent assembly of signaling complexes. *Science (New York, N.Y.),* 340(6134):871-875.

Schumacher, M.A.*, et al.* (2002) Structural basis for the recognition of a bisphosphorylated MAP kinase peptide by human VHR protein Phosphatase. *Biochemistry,* 41(9):3009-3017.

Sdano, M.A.*, et al.* (2017) A novel SH2 recognition mechanism recruits Spt6 to the doubly phosphorylated RNA polymerase II linker at sites of transcription. *Elife,* 6.

Selner, N.G.*, et al.* (2014) Diverse levels of sequence selectivity and catalytic efficiency of protein-tyrosine phosphatases. *Biochemistry,* 53(2):397-412.

Simonetta, K.R.*, et al.* (2019) Prospective discovery of small molecule enhancers of an E3 ligase-substrate interaction. *Nat Commun,* 10(1):1402.

Singh, N.*, et al.* (2012) Dual recognition of phosphoserine and phosphotyrosine in histone variant H2A.X by DNA damage response protein MCPH1. *Proc Natl Acad Sci U S A,* 109(36):14381-14386.

Song, H.*, et al.* (2001) Phosphoprotein-protein interactions revealed by the crystal structure of kinase-associated phosphatase in complex with phosphoCDK2. *Mol Cell,* 7(3):615-626.

Song, W.*, et al.* (2016) Signature motif-guided identification of receptors for peptide hormones essential for root meristem growth. *Cell Res,* 26(6):674-685.

Stamos, J.L.*, et al.* (2014) Structural basis of GSK-3 inhibition by N-terminal phosphorylation and by the Wnt receptor LRP6. *Elife,* 3:e01998.

Takeshita, K.*, et al.* (2012) Structural flexibility regulates phosphopeptide-binding activity of the tyrosine kinase binding domain of Cbl-c. *J Biochem,* 152(5):487-495.

Tang, X.*, et al.* (2012) Composite low affinity interactions dictate recognition of the cyclin-dependent kinase inhibitor Sic1 by the SCFCdc4 ubiquitin ligase. *Proc Natl Acad Sci U S A,* 109(9):3287-3292.

Tong, L.*, et al.* (1996) Crystal structures of the human p56lck SH2 domain in complex with two short phosphotyrosyl peptides at 1.0 A and 1.8 A resolution. *J Mol Biol,* 256(3):601-610.

Wagner, T.*, et al.* (2019) Structural insights into the functional versatility of an FHA domain protein in mycobacterial signaling. *Science signaling,* 12(580).

Wang, H.M.*, et al.* (2014) The catalytic region and PEST domain of PTPN18 distinctly regulate the HER2 phosphorylation and ubiquitination barcodes. *Cell Res,* 24(9):1067-1090.

Wauer, T.*, et al.* (2015) Mechanism of phospho-ubiquitin-induced PARKIN activation. *Nature,* 524(7565):370-374.

Williams, J.S.*, et al.* (2010) gammaH2A binds Brc1 to maintain genome integrity during S-phase. *EMBO J,* 29(6):1136-1148.

Williams, R.S.*, et al.* (2009) Nbs1 flexibly tethers Ctp1 and Mre11-Rad50 to coordinate DNA double-strand break processing and repair. *Cell,* 139(1):87-99.

Wu, H.H.*, et al.* (2012) Structural delineation of MDC1-FHA domain binding with CHK2-pThr68. *Biochemistry,* 51(2):575-577.

Wu, J.*, et al.* (2008) Structural and biochemical characterization of the KRLB region in insulin receptor substrate-2. *Nat Struct Mol Biol,* 15(3):251-258.

Xiang, K.*, et al.* (2012) An unexpected binding mode for a Pol II CTD peptide phosphorylated at Ser7 in the active site of the CTD phosphatase Ssu72. *Genes Dev,* 26(20):2265-2270.

Xie, C.*, et al.* (2018) Structural insights into the recognition of phosphorylated Hop1 by Mek1. *Acta Crystallogr D Struct Biol,* 74(Pt 10):1027-1038.

Yan, W.*, et al.* (2011) Structural basis of gammaH2AX recognition by human PTIP BRCT5-BRCT6 domains in the DNA damage response pathway. *FEBS Lett,* 585(24):3874-3879.

Yang, J.*, et al.* (2000) Structural basis for substrate specificity of protein-tyrosine phosphatase SHP-1. *J Biol Chem,* 275(6):4066-4071.

Yasui, N.*, et al.* (2014) Directed network wiring identifies a key protein interaction in embryonic stem cell differentiation. *Mol Cell,* 54(6):1034-1041.

Ye, Q.*, et al.* (2016) Structure of the Dictyostelium Myosin-II Heavy Chain Kinase A (MHCK-A) alpha-kinase domain apoenzyme reveals a novel autoinhibited conformation. *Sci Rep,* 6:26634.

Yu, X.*, et al.* (2011) Substrate specificity of lymphoid-specific tyrosine phosphatase (Lyp) and identification of Src kinase-associated protein of 55 kDa homolog (SKAP-HOM) as a Lyp substrate. *J Biol Chem,* 286(35):30526-30534.

Zadjali, F.*, et al.* (2011) Structural basis for c-KIT inhibition by the suppressor of cytokine signaling 6 (SOCS6) ubiquitin ligase. *J Biol Chem,* 286(1):480-490.

Zhang, N.*, et al.* (2015) Phosphorylation of synaptic vesicle protein 2A at Thr84 by casein kinase 1 family kinases controls the specific retrieval of synaptotagmin-1. *J Neurosci,* 35(6):2492-2507.

Zhang, Y.*, et al.* (2006) Determinants for dephosphorylation of the RNA polymerase II C-terminal domain by Scp1. *Mol Cell,* 24(5):759-770.

Zhao, B.*, et al.* (2016) Structural basis for concerted recruitment and activation of IRF-3 by innate immune adaptor proteins. *Proc Natl Acad Sci U S A,* 113(24):E3403-3412.

Zhu, J.*, et al.* (2014) Phosphorylation-dependent interaction between tumor suppressors Dlg and Lgl. *Cell Res,* 24(4):451-463.
